# Supplementary material for: Scrutinizing particle size related bond strengthening in anatase TiO2
Source: Royal Society of Chemistry journal article supplement (doi:10.1039/d2dt02128e), 2022-01-01
Supplement: d2dt02128e1.pdf [file d2dt02128e1.pdf]

**Supporting information**

**for**

**Scrutinizing particle size related bond strengthening in anatase TiO<sub>2</sub>**

Jinlong Yu,<sup>a</sup> Aref Mamahkel,<sup>a</sup> Frederik Søndergaard-Pedersen,<sup>a</sup> Marcel Ceccato,<sup>b</sup> Bo Brummerstedt Iversen<sup>a,\*</sup>

<sup>a</sup>Center for Integrated Materials Research, Department of Chemistry and iNANO, Aarhus University, DK-8000 Aarhus, Denmark

<sup>b</sup>Interdisciplinary Nanoscience Center (iNANO), Aarhus University, DK-8000 Aarhus, Denmark

\*Corresponding author: bo@chem.au.dk

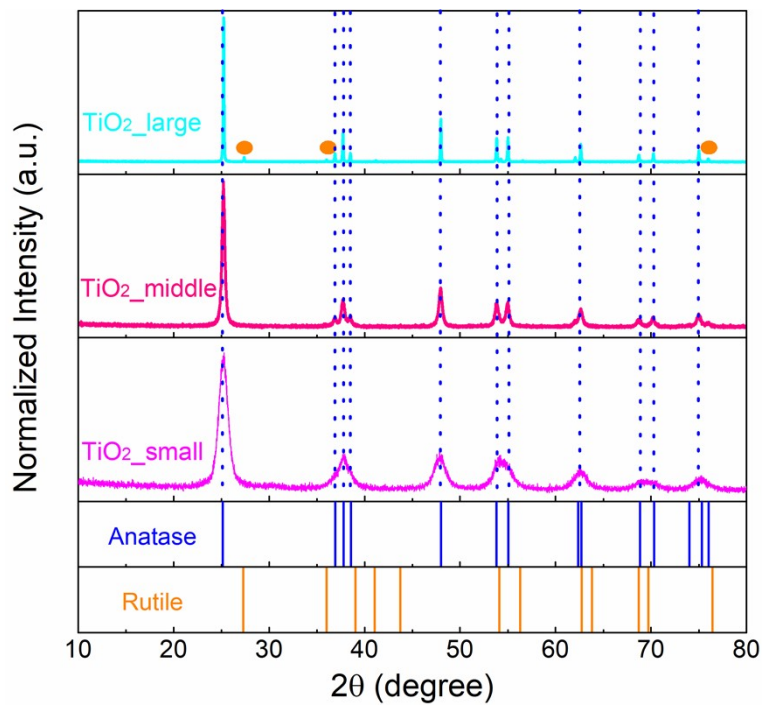

**Figure S1.** Room temperature laboratory PXRD patterns of synthesized anatase particles with distinct sizes ( $\lambda = 1.540590 \text{ \AA}$ ). The PXRD patterns of JCPDS 00-021-1272 (anatase) and 01-078-4187 (rutile) are included for comparison.

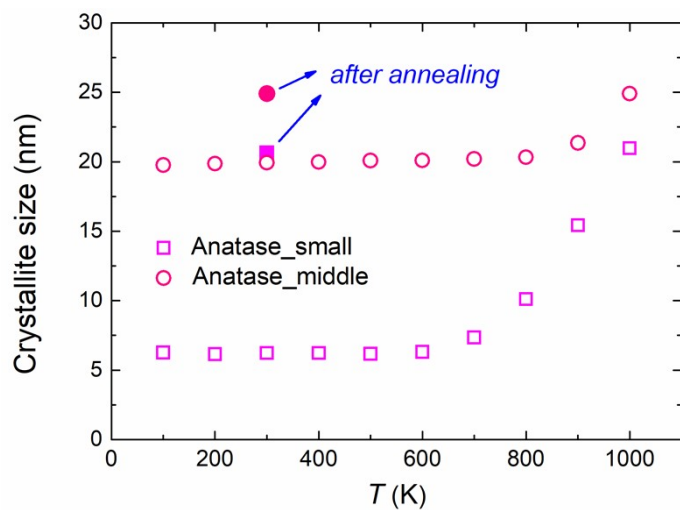

**Figure S2.** Variation of crystallite sizes with temperature obtained from Rietveld refinement for small and middle anatase particles.

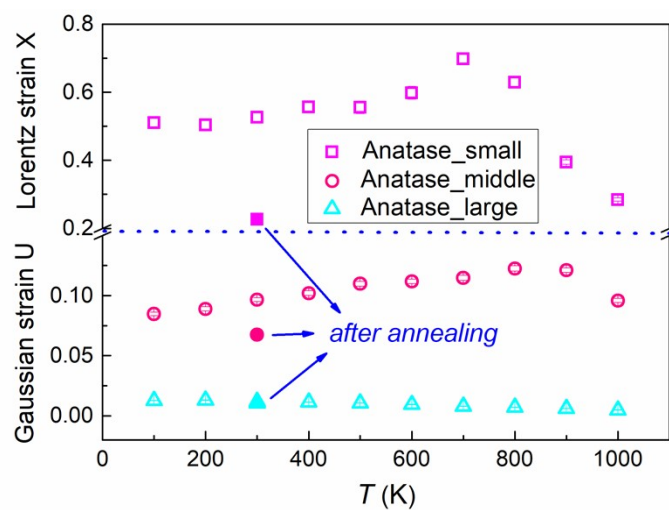

**Figure S3.** Variation of isotropic strains with temperature obtained from Rietveld refinement for anatase particles with distinct sizes.

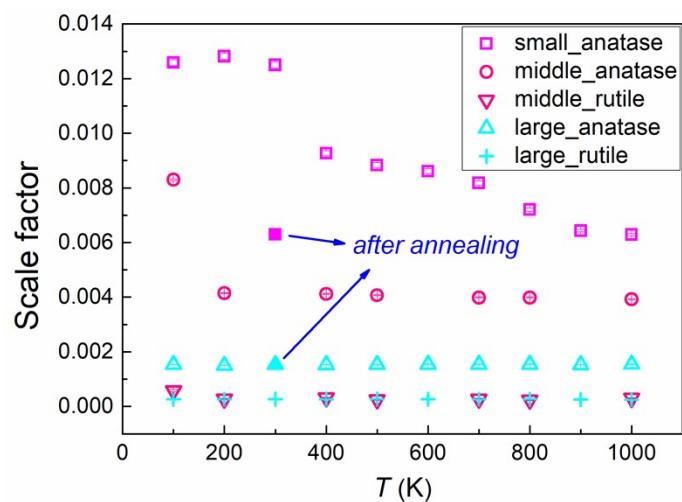

**Figure S4.** Variation of scale factors with temperature obtained from Rietveld refinement for  $\text{TiO}_2$  particles with distinct sizes.

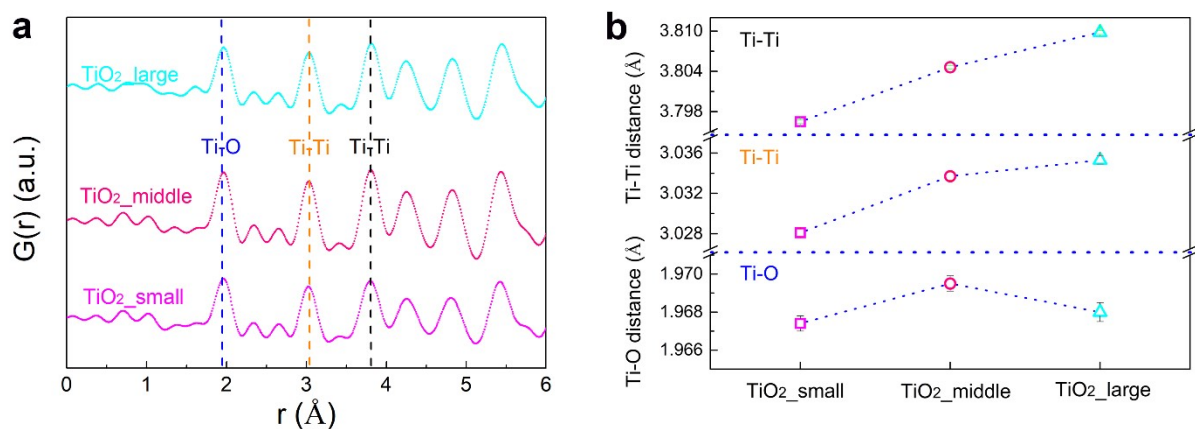

**Figure S5.** (a) PDFs of as-synthesized small, middle and large anatase particles calculated from total scattering data obtained at SPring8. (b) Variation of distinct interatomic distances with particle size for as-synthesized anatase particles calculated from SPring8 data.

**Table S1.** Unit cell parameters  $a$  and  $c$  for anatase particles with distinct sizes obtained from refinement on their PDFs calculated from SPring8 total scattering data.

|                | Anatase small | Anatase middle | Anatase large |
|----------------|---------------|----------------|---------------|
| $a/\text{\AA}$ | 3.798(2)      | 3.786(1)       | 3.7854(2)     |
| $c/\text{\AA}$ | 9.476(9)      | 9.507(5)       | 9.515(1)      |

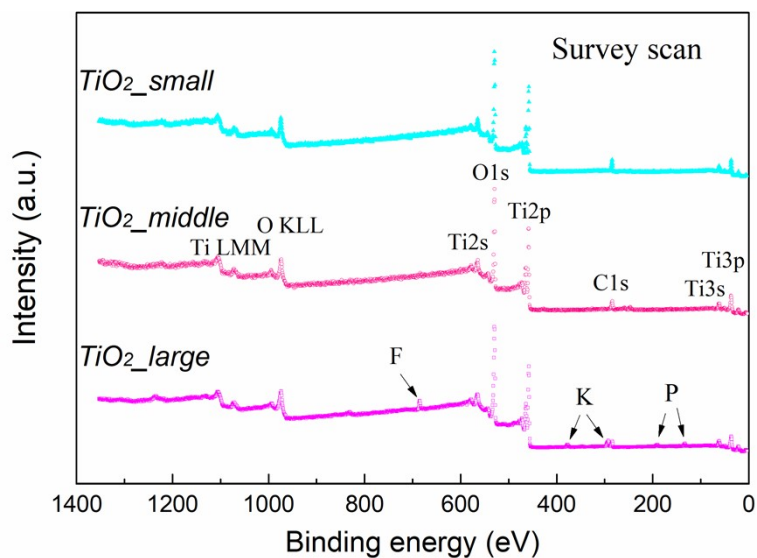

**Figure S6.** XPS survey scan of small, middle and large anatase particles.

**Table S2.** Binding energy (eV), FWHM (eV) and fitted peak area (%) for different components in high resolution O<sub>1s</sub> spectra of small, middle and large anatase TiO<sub>2</sub> samples.

| Sample                  | Component                                                | Binding energy (eV) | FWHM (eV) | Fitted peak area (%) |
|-------------------------|----------------------------------------------------------|---------------------|-----------|----------------------|
| Small TiO <sub>2</sub>  | O <sub>1s</sub> (O-Ti)                                   | 530.0               | 1.15      | 82.6                 |
|                         | O <sub>1s</sub> (-OH)                                    | 531.2               | 2.58      | 17.4                 |
| Middle TiO <sub>2</sub> | O <sub>1s</sub> (O-Ti)                                   | 529.8               | 1.09      | 83.0                 |
|                         | O <sub>1s</sub> (-OH)                                    | 530.5               | 2.91      | 17.0                 |
| Large TiO <sub>2</sub>  | O <sub>1s</sub> (O-Ti)                                   | 529.9               | 1.14      | 68.5                 |
|                         | O <sub>1s</sub> (-OH, (PO <sub>4</sub> ) <sup>3-</sup> ) | 531.4               | 2.75      | 31.5                 |

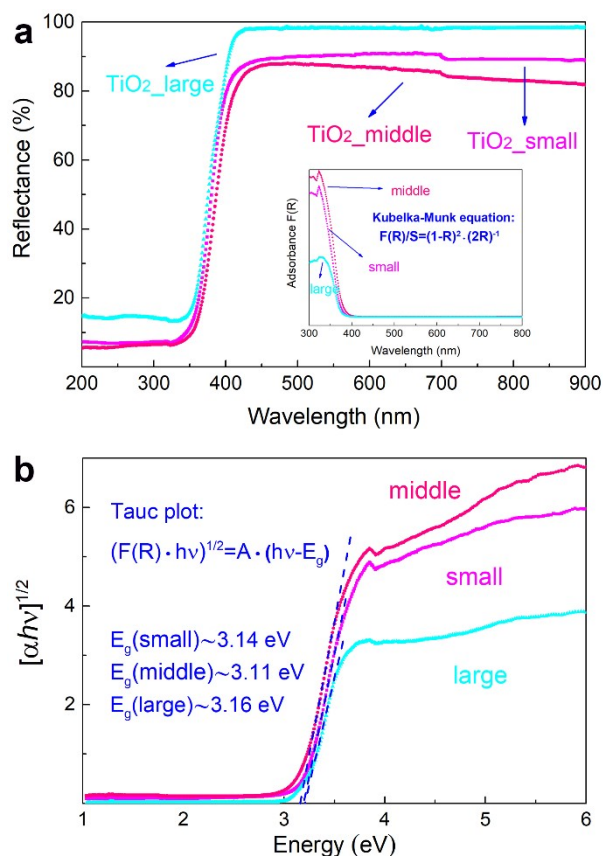

**Figure S7.** (a) Diffuse reflectance spectra of as-synthesized small, middle and large anatase particles. Inset is the relevant adsorption spectra converted according to Kubelka-Munk equation. (b) Tauc plot of  $[F(R) \cdot hv]^{1/2}$  versus  $hv$  for various anatase particles.

In order to rule out the effect of oxygen vacancies on the variation of chemical bond length and strength in as-synthesized anatase particles, optical diffuse reflectance patterns are recorded. Patterns for all three TiO<sub>2</sub> samples are shown in Fig. S7. The inset in Fig. S7a shows the adsorption patterns converted from relevant reflectance spectra according to Kubelka-Munk function. The intrinsic UV-region adsorption edge, typical for TiO<sub>2</sub> particles, is identified for all samples. No obvious adsorption is found in the visible region for all samples. In addition, the band gap energies derived from Tauc plot (see Fig. S7b) are around

3.14 eV, 3.11 eV and 3.16 eV for the small, middle and large TiO<sub>2</sub> particles, respectively, all of which are much larger than that determined for black TiO<sub>2</sub> materials where large amount of oxygen vacancies exist.<sup>1</sup> Hence, the potential effect from oxygen vacancies on the chemical bond variation in as-synthesized anatase particles are ruled out.

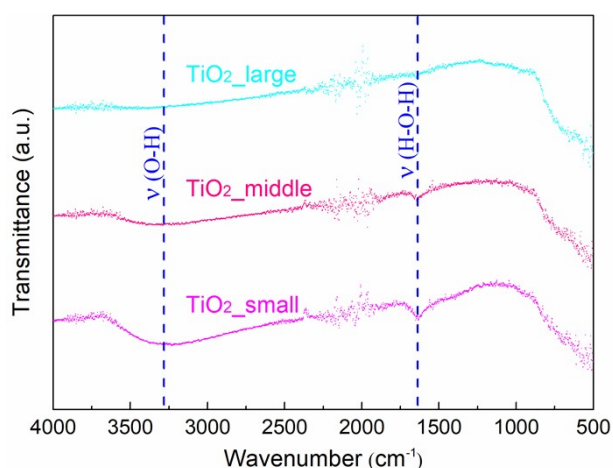

**Figure S8.** FT-IR spectra recorded from 500 to 4000 cm<sup>-1</sup> for as-synthesized anatase particles.

FT-IR spectra of all TiO<sub>2</sub> particles are recorded, aiming to reveal surface functional groups. As seen in Fig. S8, two main peaks at around 3380 cm<sup>-1</sup> as well as 1633 cm<sup>-1</sup> assigned to typical O-H stretching mode of H<sub>2</sub>O and H-O-H bending mode of H<sub>2</sub>O respectively, are identified for all TiO<sub>2</sub> particles.<sup>2</sup> Due to lacking of high-resolution spectra data, detailed distinguishing of the broad band of O-H stretching mode into structural O-H and surface O-H cannot be achieved. As discussed in the main text, these –OH and hydration layers play a great role in altering the chemical bond length and strength in as-synthesized anatase particles.

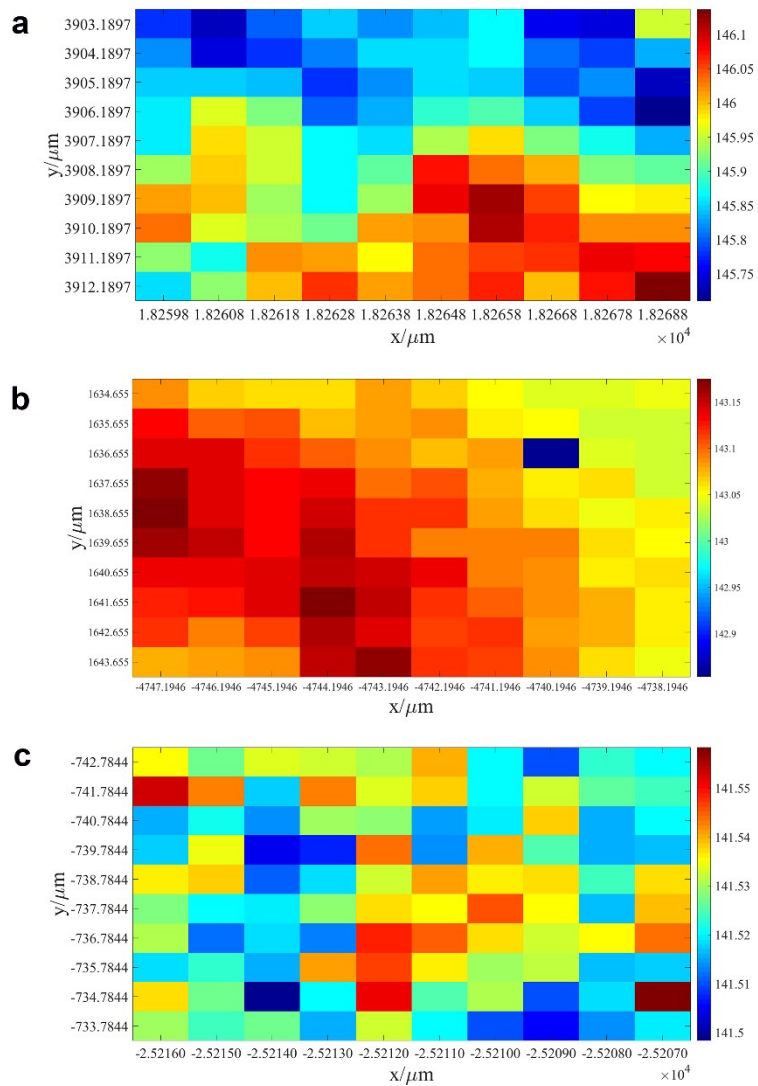

**Figure S9.** Mapping of Raman peak shift for  $E_g$  ( $\sim 145 \text{ cm}^{-1}$ ) mode for (a) small, (b) middle and (c) large anatase particles.



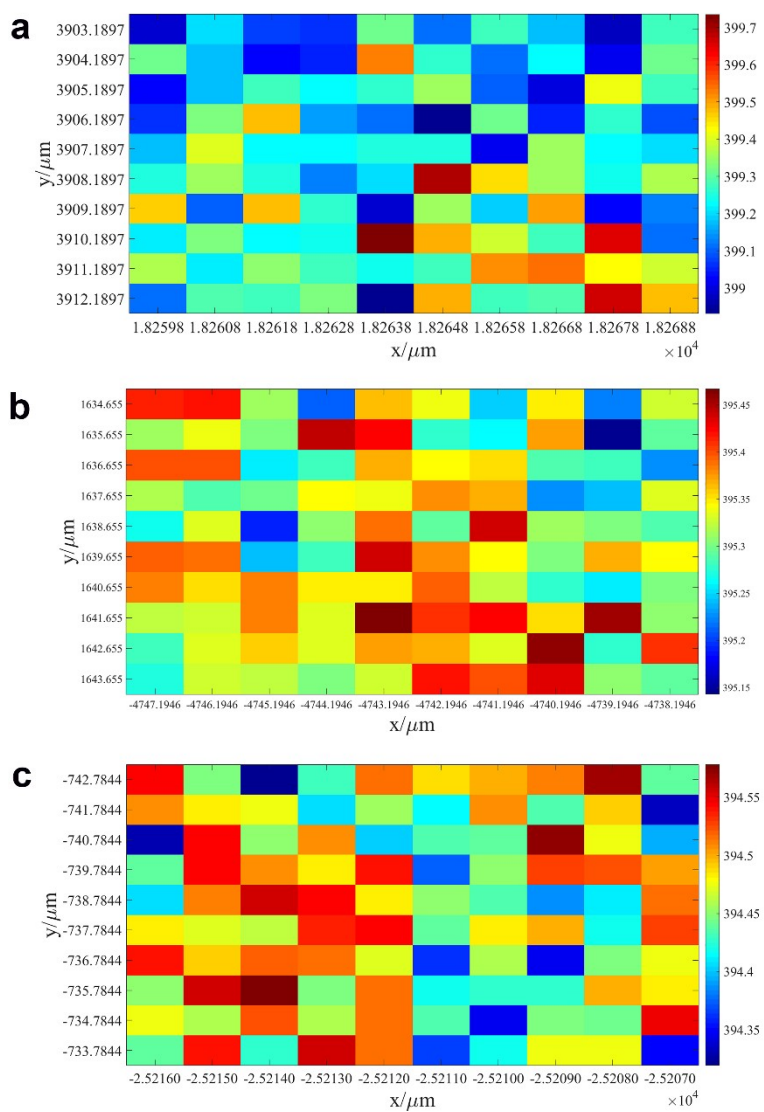

**Figure S10.** Mapping of Raman peak shift for  $B_{1g}$  ( $\sim 397 \text{ cm}^{-1}$ ) mode for (a) small, (b) middle and (c) large anatase particles.

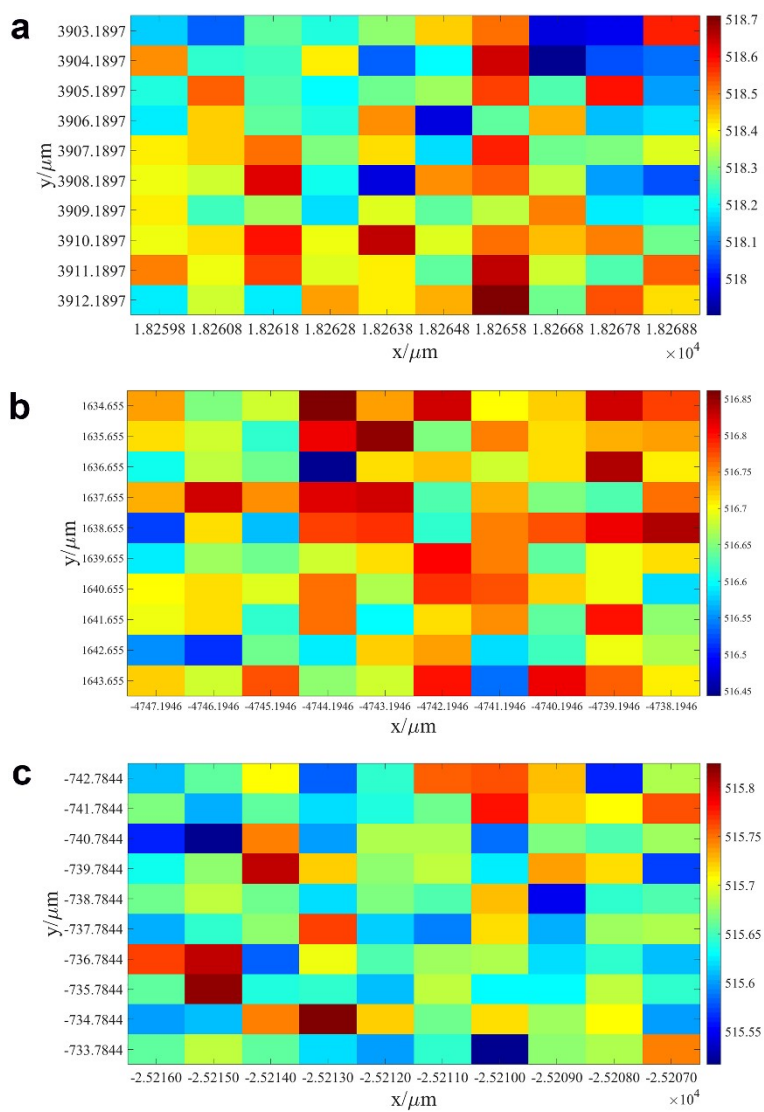

**Figure S11.** Mapping of Raman peak shift for  $A_{1g}$  ( $\sim 513 \text{ cm}^{-1}$ ) +  $B_{1g}$  ( $\sim 519 \text{ cm}^{-1}$ ) mode for (a) small, (b) middle and (c) large anatase particles.

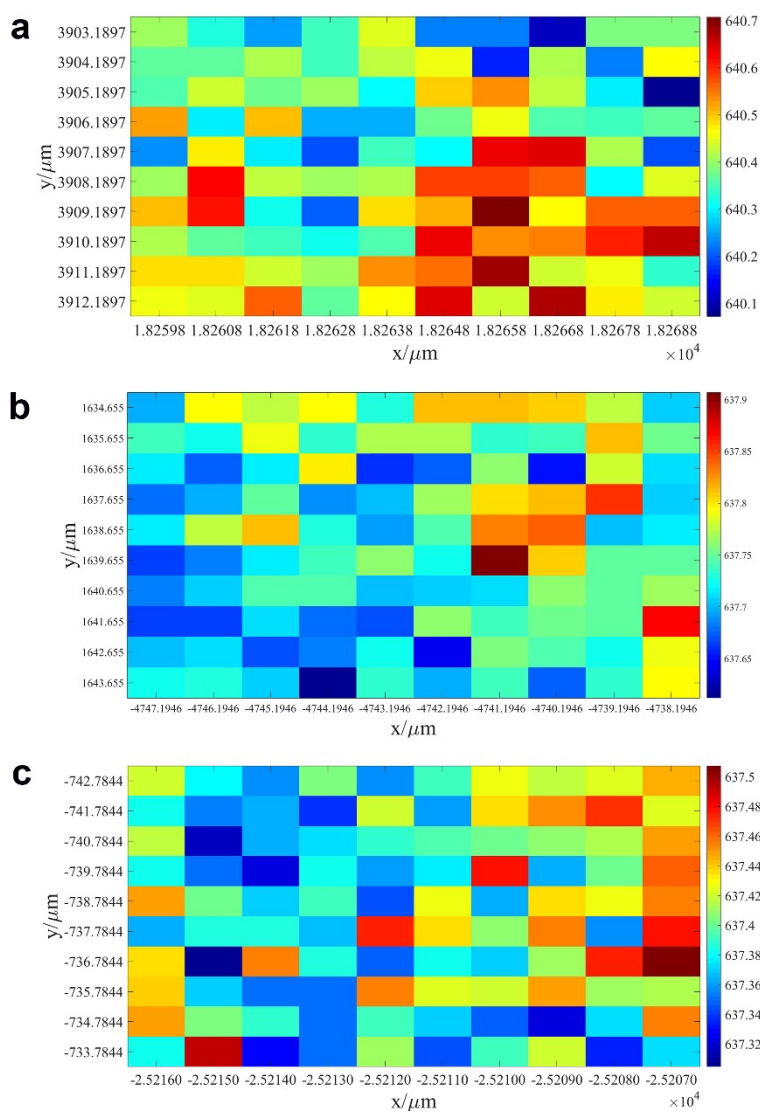

**Figure S12.** Mapping of Raman peak shift for  $E_g$  ( $\sim 638 \text{ cm}^{-1}$ ) mode for (a) small, (b) middle and (c) large anatase particles.

## References

1. X. B. Chen, L. Liu, P. Y. Yu and S. S. Mao, *Science*, 2011, **331**, 746-750.
2. Y. Ohno, K. Tomita, Y. Komatsubara, T. Taniguchi, K.-i. Katsumata, N. Matsushita, T. Kogure and K. Okada, *Cryst. Growth Des.*, 2011, **11**, 4831-4836.
